# Supplementary material for: Revival of the nearly extinct fluorescence of coumarin 6 in water and complete transfer of energy to rhodamine 123
Source: Royal Society of Chemistry journal article supplement (doi:10.1039/c7sm01198a), 2017-01-01
Supplement: c7sm01198a1.pdf [file c7sm01198a1.pdf]

## Electronic Supplementary Information

### Revival of nearly extinct fluorescence of coumarin 6 in water and complete transfer of energy to rhodamine 123

Rajashree Banerjee, and Pradipta Purkayastha\*

Department of Chemical Sciences, Indian Institute of Science Education and Research (IISER) Kolkata, Mohanpur 741246, WB, India.

#### Experimental section

Coumarin 6 (C6), sodium dodecyl sulphate, Rhodamin 123 (Rh123) and ethanol were purchased from Sigma- Aldrich and used as received. Double distilled water was used throughout the experiment. 50  $\mu\text{l}$  of 50  $\mu\text{M}$  stock solution of C6 in ethanol was added to water to get the final concentration as 1  $\mu\text{M}$ . 310  $\mu\text{l}$  of 93 mM aqueous stock solution of SDS was added in calculated amount so that the experimental solution contains SDS micelles. The stock solution of Rh123 (100  $\mu\text{M}$ ) was prepared in ethanol and added to the experimental solution in steps.

The absorption spectra were recorded in a Cary 300 Bio UV-Vis spectrophotometer from Agilent. The fluorescence measurements were done on a QM-40 spectrofluorimeter from PTI. The fluorescence lifetimes were measured by the method of time correlated single photon counting (TCSPC) using a picoseconds spectrofluorimeter from Horiba Jobin Yvon IBH equipped with a FluoroHub single photon counting controller, Fluoro3PS precision photomultiplier power supply and FC-MCP-50SC MCP-PMT detection unit. 405 nm (resolution <200 ps) laser was used as the excitation pulse. The FRET efficiency was calculated by using the following equation:

$$\text{FRET efficiency} = 1 - \frac{F_{DA}}{F_D}$$

where,  $F_{DA}$  and  $F_D$  are the fluorescence intensities of donor in presence and absence of acceptor, respectively.

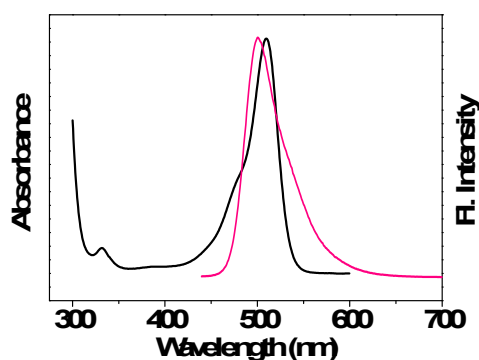

Figure S1. Normalized absorption and emission spectra of Rh123 (black) and C6 (pink).
